# Supplementary material
Source: publisher site journal article supplement (https://www.dovepress.com/article/439930)
Supplement: Supplementary file 1 [file get_supplementary_file.php]

**Supplementary table 1**: Process step details followed at the study sites.

| **Parameters** | **Workflow sites*** | | |
| --- | --- | --- | --- |
| **Augsburg** | **Fussen** | **Kaufbeuren** |
| **Optical biometry** | Zeiss IOLMaster 700 | Zeiss IOLMaster 700 | Zeiss IOLMaster 700 |
| **Corneal Topography**# | Oculus Pentacam HR | Oculus Pentacam HR# | Oculus Pentacam HR |
| **OCT** | Heidelberg Spectralis | Zeiss Cirrus 6000 | Not used in cataract workflow |
| **Endothelial cell count** | Nidek CEM 530 | Nidek CEM 530 | Not used in cataract workflow |
| **IOL calculation** | Zeiss FORUM® | Online IOL calculator | |
| **Surgery/axis marking** | CALLISTO eye | Marking IOL axis manually through slit lamp | |

*Note: Füssen and Kaufbeuren continued with the existing conventional workflow while Augsburg used digital cataract workflow.

#The Pentacam examination in Augsburg includes pachymetry whereas in Füssen and Kaufbeuren, pachymetry was not noted separately as part of the Pentacam examination.

**Abbreviations:** IOL, intraocular lens; OCT, Optical coherence tomography
